# Supplementary material for: The Staphylococcus aureus Protein Sbi Acts as a Complement Inhibitor and Forms a Tripartite Complex with Host Complement Factor H and C3b
Source: PubMed Central journal article supplement (PMC2602735; doi:10.1371/journal.ppat.1000250), 2008-12-26

**A****1:1 model (langmuir)**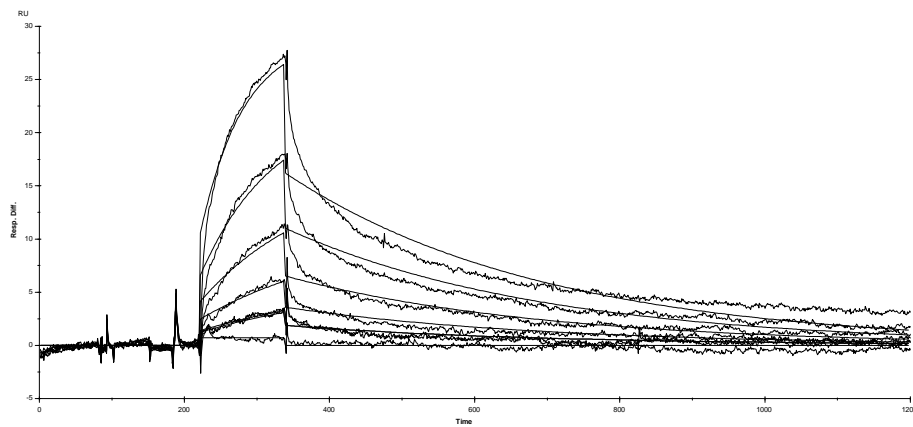**B****2:1 model**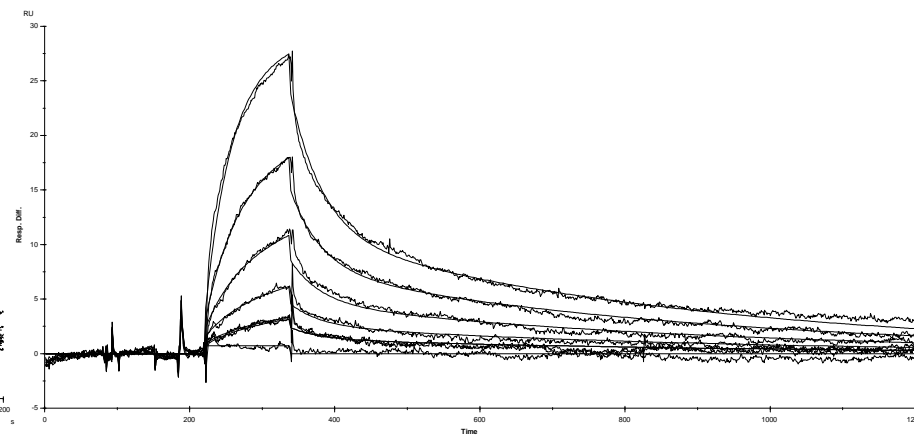**C**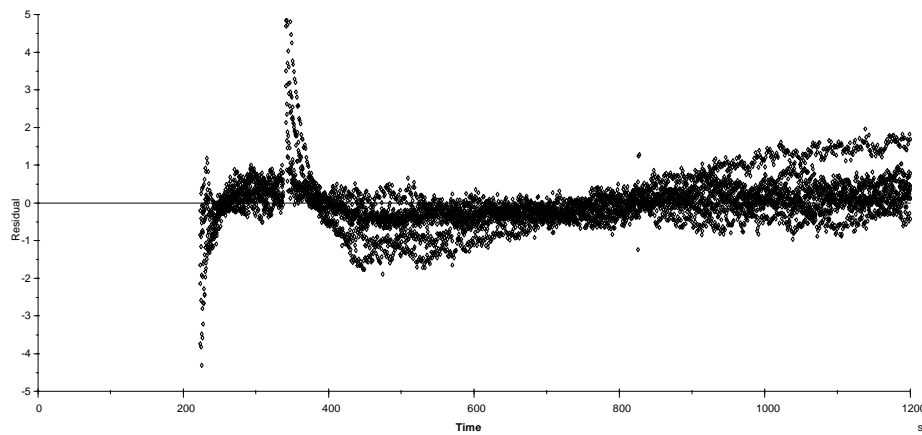**D**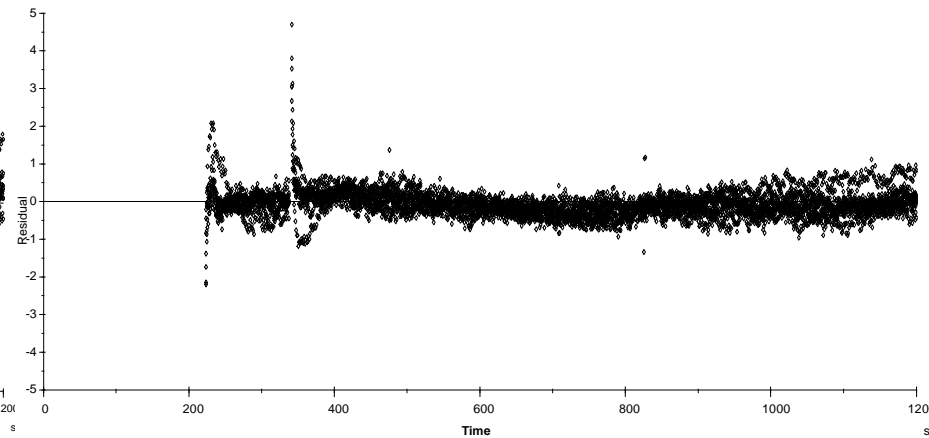

Supplement: ppat.1000250.s002.pdf [file ppat.1000250.s002.pdf]
