# Supplementary material for: The Staphylococcus aureus Protein Sbi Acts as a Complement Inhibitor and Forms a Tripartite Complex with Host Complement Factor H and C3b
Source: PLOS journal article supplement (doi:10.1371/journal.ppat.1000250), 2008-12-26

**A**

**Immobilisation of Sbi-I**

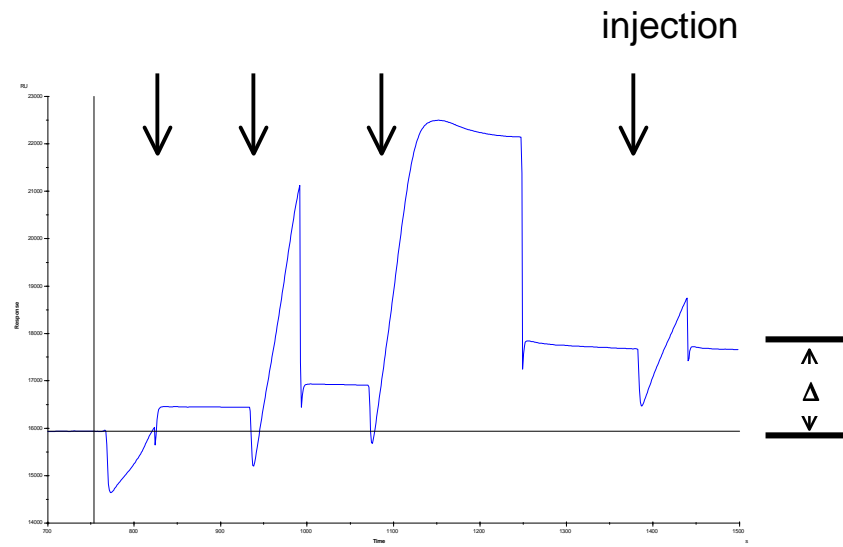

**B**

**Binding of an unrelated mouse IgG to immobilized Sbi-I**

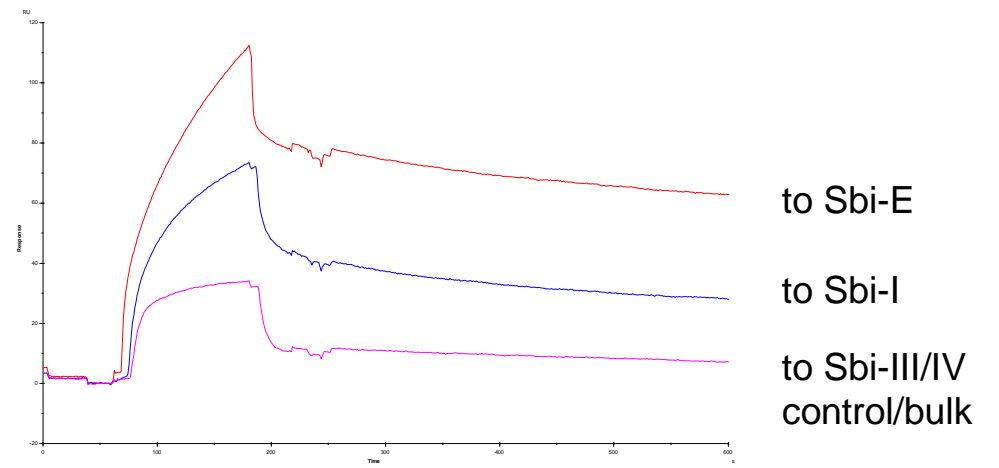

Supplement: S3 (10.1371/journal.ppat.1000250.s003) [file journal.ppat.1000250.s003]
